# Supplementary material for: Disruption of PDGFRα-initiated PI3K activation and migration of somite derivatives leads to spina bifida
Source: Oxford University Press journal article supplement (doi:10.1242/dev.013763), 2008-01-11
Supplement: dev013763tables1.pdf [file dev013763tables1.pdf]

**Table S1. Survival and proliferation in dorsal neural tube mesenchyme**

| Stage | PDGFR $\alpha$ genotype | Total cells  | Prolif. index | TUNEL index |
|-------|-------------------------|--------------|---------------|-------------|
| E14.5 | +/+                     | 92 $\pm$ 10  | 34 $\pm$ 2%   | 0%          |
|       | PI3K/PI3K               | 59 $\pm$ 9   | 36 $\pm$ 5%   | 0%          |
| E15.5 | +/+                     | 179 $\pm$ 16 | 26 $\pm$ %    | 0%          |
|       | PI3K/PI3K               | 50 $\pm$ 10  | 29 $\pm$ 3%   | 0%          |

Sections through the lumbar region of E14.5 and E15.5 *PDGFR $\alpha$* <sup>+/+</sup> and *PDGFR $\alpha$* <sup>PI3K/PI3K</sup> embryos were examined for cell number, cell proliferation and apoptosis.
